# Supplementary material for: Production of Various Monomer-Ratio Biodegradable Poly(3-hydroxybutyrate-<em>co</em>-4-hydroxybutyrate) Films for Wide Range of Applications
Source: Preprints.org preprint supplement (doi:10.20944/preprints202204.0284.v1), 2022-04-28
Supplement: Supplementary file 1 [file supplementary]

Supplementary material to:

Production of various monomer-ratio biodegradable poly(3-hydroxybutyrate-*co*-4-hydroxybutyrate) films for wide range of applications

Aneta Pospisilova1, Juraj Vodicka1, Monika Trudicova1, Zuzana Juglova1, Jiri Smilek1, Premysl Mencik1, Jiri Masilko1, Eva Slaninova1, Veronika Melcova1, Michal Kalina1, Stanislav Obruca1 and Petr Sedlacek1,*

1 Faculty of Chemistry, Brno University of Technology, Purkynova 118, 612 00 Brno, Czech Republic

***** Corresponding author: Petr Sedlacek, sedlacek-p@fch.vut.cz; Tel.: +420 541 149 486

**Table S1:** Composition of microelement solution (MES).

| Component | Amount [g/L] |
| --- | --- |
| FeCl3 ∙ 6 H2O | 9.7 |
| CaCl2 ∙ 2 H2O | 7.8 |
| CuSO4 ∙ 5 H2O | 0.156 |
| CoCl2 ∙ 6 H2O | 0.119 |
| NiCl2 ∙ 6 H2O | 0.118 |
| CrCl2 | 0.062 |
| 0,1 M HCl | 1000 mL |

**Table S2:** Composition of trace element solution (TES).

| Component | Amount [g/L] |
| --- | --- |
| EDTA | 50 |
| FeCl3 | 8.3 |
| ZnCl2 | 0.84 |
| CuCl2 ∙ 2 H2O | 0.13 |
| CoCl2 ∙ 6 H2O | 0.1 |
| MnCl2 ∙ 6 H2O | 0.016 |
| H3BO3 | 0.1 |
| Water | 1000 mL |
